# Supplementary material
Source: Springer Nature journal article supplement (https://www.springermedizin.de/resource/supplementary/12936_2012_2060_MOESM1_ESM.pdf/9543456)

# Confirmation rates by health center (dry season)

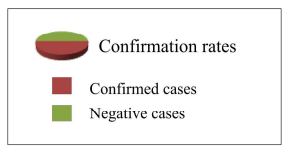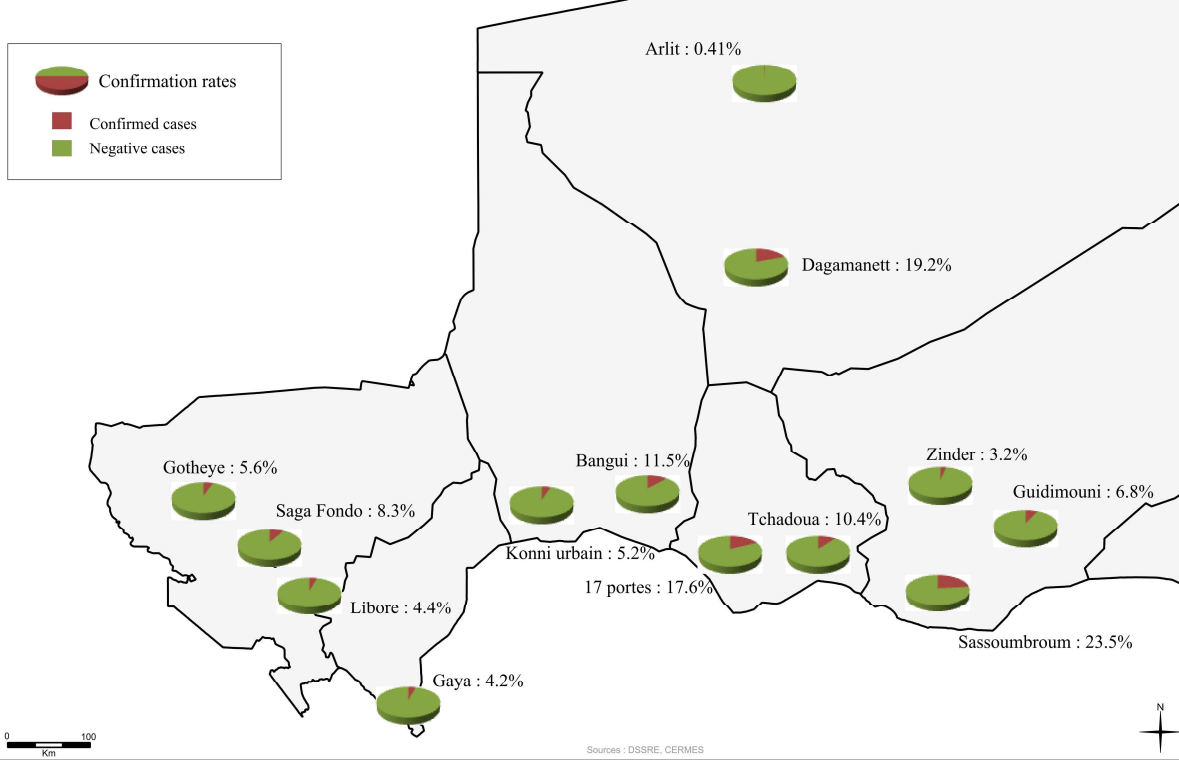

# Confirmation rates by health center (rainy season)

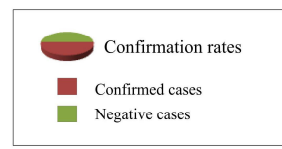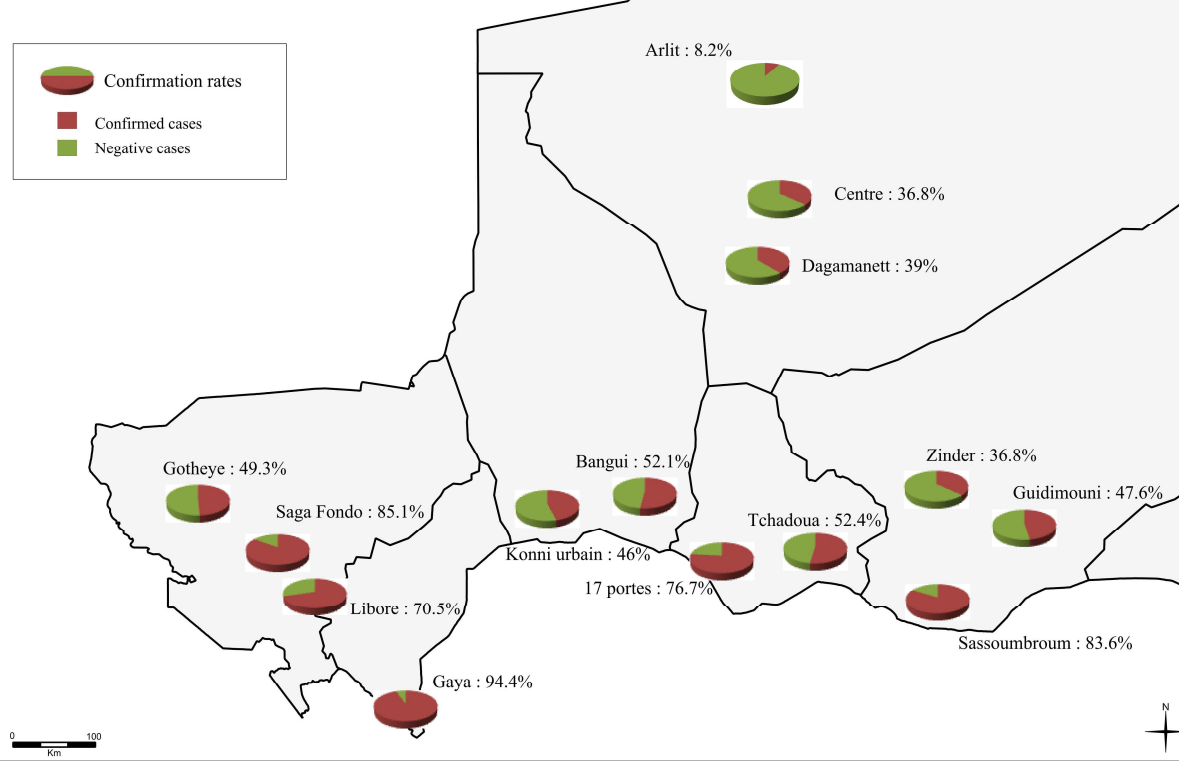

Supplement: MOESM1 [file 9543456]
